# Supplementary material
Source: Springer Nature journal article supplement (https://www.springermedizin.de/resource/supplementary/13058_2009_2544_MOESM9_ESM.pdf/9701666)

(a)

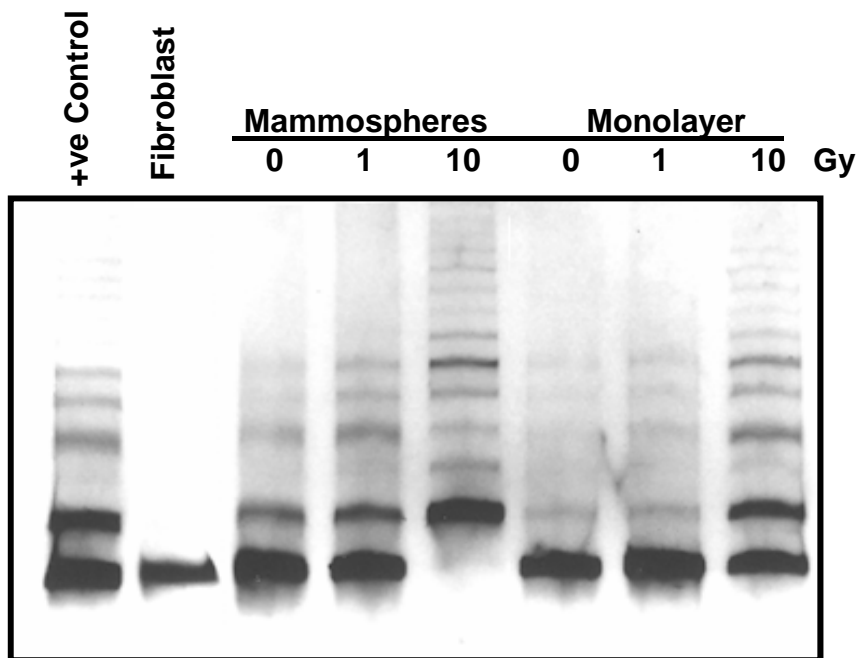

(b)

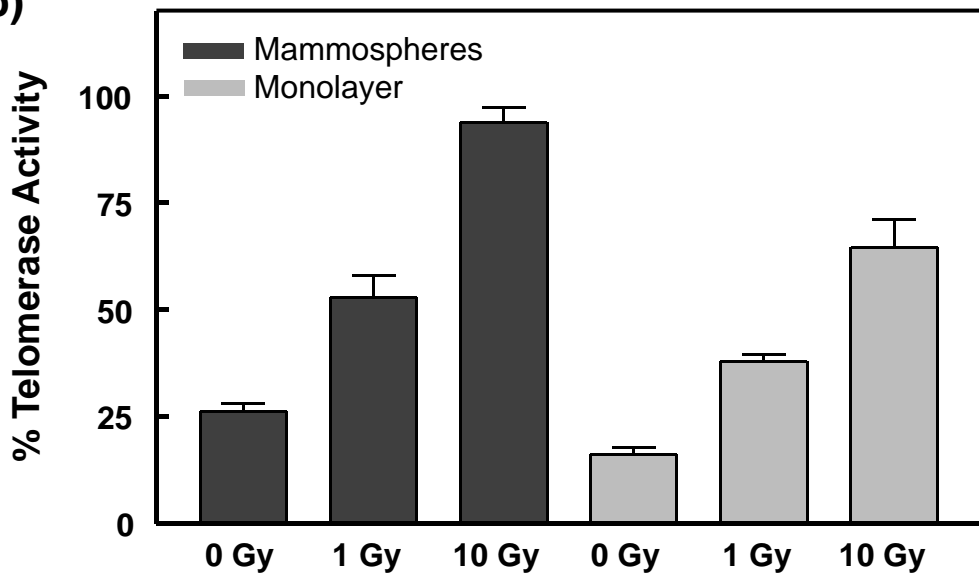

Supplement: MOESM9 [file 9701666]
